# Supplementary material for: Disease Diagnostics and Potential Coinfections by Vibrio coralliilyticus During an Ongoing Coral Disease Outbreak in Florida
Source: Front Microbiol. 2020 Oct 26;11:569354. doi: 10.3389/fmicb.2020.569354 (PMC7649382; doi:10.3389/fmicb.2020.569354)
Supplement: Supplementary file 1 [file Data_Sheet_1.zip]

Archive with 9 entries (8 files):
- S Files/
- S Files/Supplementary File (S1).xlsx
- S Files/Supplementary File (S2).docx
- S Files/Supplementary File (S2).pdf
- S Files/Supplementary File (S3).mp4
- S Files/Supplementary File (S4).pdf
- S Files/Supplementary File (S5).pdf
- S Files/Supplementary File (S6).pdf
- S Files/Supplementary File (S7).mp4
