# Supplementary material for: Disease Diagnostics and Potential Coinfections by Vibrio coralliilyticus During an Ongoing Coral Disease Outbreak in Florida
Source: Front Microbiol. 2020 Oct 26;11:569354. doi: 10.3389/fmicb.2020.569354 (PMC7649382; doi:10.3389/fmicb.2020.569354)
Supplement: Supplementary file 1 [file Data_Sheet_1.zip › S Files/Supplementary File (S1).xlsx]

## Sheet: Overview
Colony ID	Speceis	Collection region	Specific Site Name	Site Description	Latitude	Longitude	Collection Date	Fragment Size (cm2)	Starting Healthy Tissue (%)	Tissue loss?	Bleaching?	VcpA Test	Outcome	Days till final outcome
McD-4 FtL	M. cavernosa	Ft. lauderdale	FTL 5	Straight outside of city center	26° 08'54.91" N	81° 05'45.29" W	2019-03-26	15	70	+	+	-	Slow prgression	21
McD-5 FtL	M. cavernosa	Ft. lauderdale	FTL 5	Straight outside of city center	26° 08'54.91" N	81° 05'45.29" W	2019-03-26	9	5	+	-	-	Complete mortality	2
McD-8 FtL	M. cavernosa	Ft. lauderdale	FTL 5	Straight outside of city center	26° 08'54.91" N	81° 05'45.29" W	2019-03-26	15	40	+	+	-	Complete mortality	15
McD-9 FtL	M. cavernosa	Ft. lauderdale	FTL 5	Straight outside of city center	26° 08'54.91" N	81° 05'45.29" W	2019-03-26	15	50	+	+	-	Complete mortality	17
McD-10 FtL	M. cavernosa	Ft. lauderdale	FTL 5	Straight outside of city center	26° 08'54.91" N	81° 05'45.29" W	2019-03-26	20	10	-	+	-	Stopped	1
McD-11 FtL	M. cavernosa	Ft. lauderdale	FTL 5	Straight outside of city center	26° 08'54.91" N	81° 05'45.29" W	2019-05-09	8	50	+	-	-	Complete mortality	9
McD-12 FtL	M. cavernosa	Ft. lauderdale	FTL 5	Straight outside of city center	26° 08'54.91" N	81° 05'45.29" W	2019-05-09	8	75	+	-	-	Slow prgression	21
McD-13 FtL	M. cavernosa	Ft. lauderdale	FTL 5	Straight outside of city center	26° 08'54.91" N	81° 05'45.29" W	2019-05-09	18	75	+	+	-	Stopped	9
McD-14 FtL	M. cavernosa	Ft. lauderdale	FTL 5	Straight outside of city center	26° 08'54.91" N	81° 05'45.29" W	2019-05-09	12	80	+	+	-	Slow prgression	13
McD-15 FtL	M. cavernosa	Ft. lauderdale	FTL 5	Straight outside of city center	26° 08'54.91" N	81° 05'45.29" W	2019-05-09	18	50	-	+	-	Slow prgression	11
McD-16 FtL	M. cavernosa	Ft. lauderdale	FTL 5	Straight outside of city center	26° 08'54.91" N	81° 05'45.29" W	2019-05-09	5	80	+	-	+	Complete mortality	9
McD-17 FtL	M. cavernosa	Ft. lauderdale	FTL 5	Straight outside of city center	26° 08'54.91" N	81° 05'45.29" W	2019-05-09	6	50	+	-	+	Complete mortality	3
McD-18 FtL	M. cavernosa	Ft. lauderdale	FTL 5	Straight outside of city center	26° 08'54.91" N	81° 05'45.29" W	2019-06-28	16	60	+	-	-	Complete mortality	6
McD-19 FtL	M. cavernosa	Ft. lauderdale	FTL 5	Straight outside of city center	26° 08'54.91" N	81° 05'45.29" W	2019-06-28	14	75	+	+	+	Complete mortality	5
McD-20 FtL	M. cavernosa	Ft. lauderdale	FTL 5	Straight outside of city center	26° 08'54.91" N	81° 05'45.29" W	2019-06-28	12	60	+	-	-	Stopped	3
McD-21 FtL	M. cavernosa	Ft. lauderdale	FTL 5	Straight outside of city center	26° 08'54.91" N	81° 05'45.29" W	2019-06-28	12	50	+	+	-	Slow prgression	21
McD-22 FtL	M. cavernosa	Ft. lauderdale	FTL 5	Straight outside of city center	26° 08'54.91" N	81° 05'45.29" W	2019-06-28	15	70	+	-	+	Complete mortality	6
McD-23 FtL	M. cavernosa	Ft. lauderdale	FTL 5	Straight outside of city center	26° 08'54.91" N	81° 05'45.29" W	2019-06-28	3	50	+	+	-	Stopped	1
McD-24 FtL	M. cavernosa	Ft. lauderdale	FTL 5	Straight outside of city center	26° 08'54.91" N	81° 05'45.29" W	2019-08-09	30	85	+	+	-	Stopped	5
McD-25 FtL	M. cavernosa	Ft. lauderdale	FTL 5	Straight outside of city center	26° 08'54.91" N	81° 05'45.29" W	2019-08-09	9	90	+	+	-	Stopped	1
McD-26 FtL	M. cavernosa	Ft. lauderdale	FTL 5	Straight outside of city center	26° 08'54.91" N	81° 05'45.29" W	2019-08-09	15	60	+	+	-	Slow prgression	16
McD-27 FtL	M. cavernosa	Ft. lauderdale	FTL 5	Straight outside of city center	26° 08'54.91" N	81° 05'45.29" W	2019-08-09	12	95	+	+	-	Stopped	1
McD-28 FtL	M. cavernosa	Ft. lauderdale	FTL 5	Straight outside of city center	26° 08'54.91" N	81° 05'45.29" W	2019-08-09	12	30	+	+	-	Slow prgression	16
McD-29 FtL	M. cavernosa	Ft. lauderdale	FTL 5	Straight outside of city center	26° 08'54.91" N	81° 05'45.29" W	2019-08-09	54	10	+	+	-	Stopped	1
OfD-1 FtL	O. faveolata	Ft. lauderdale	FTL 5	Straight outside of city center	26° 08'54.91" N	81° 05'45.29" W	2019-06-28	7	70	+	-	+	Complete mortality	3
OfD-2 FtL	O. faveolata	Ft. lauderdale	FTL 5	Straight outside of city center	26° 08'54.91" N	81° 05'45.29" W	2019-06-28	9	85	+	-	-	Complete mortality	10
OfD-3 FtL	O. faveolata	Ft. lauderdale	FTL 5	Straight outside of city center	26° 08'54.91" N	81° 05'45.29" W	2019-06-28	21	95	-	+	-	Stopped	1
OfD-4 FtL	O. faveolata	Ft. lauderdale	FTL 5	Straight outside of city center	26° 08'54.91" N	81° 05'45.29" W	2019-06-28	20	95	+	+	-	Stopped	1
CnD-1	C. natans	FL Keys	Boot Key-MOTE	Reefs surrounding Boot Key	24°41′46″ N	81°06′07″ W	2019-04-05	20	50	+	-	-	Complete mortality	5
CnD-2	C. natans	FL Keys	Karen's Inside Patch	Just NW of Looe Key	24° 34'43.2" N	81° 26'19.2" W	2019-09-09	28	40	+	+	-	Complete mortality	9
CnD-3	C. natans	FL Keys	Karen's Inside Patch	Just NW of Looe Key	24° 34'43.2" N	81° 26'19.2" W	2019-09-09	56	60	+	+	-	Complete mortality	18
CnD-4	C. natans	FL Keys	Acer-24 (Karen)	Looe Key	24° 33'10.2" N	81° 26'14.3" W	2019-09-09	25	50	+	-	-	Complete mortality	7
CnD-5	C. natans	FL Keys	Birthday Reef (Mote)	Between Sugarloaf and Looe Key	24° 34'45.0" N	81° 29'48.9" W	2019-10-23	54	50	+	-	-	Complete mortality	3
CnD-6	C. natans	FL Keys	Birthday Reef (Mote)	Between Sugarloaf and Looe Key	24° 34'45.0" N	81° 29'48.9" W	2019-10-23	48	40	+	-	-	Complete mortality	3
CnD-7	C. natans	FL Keys	Birthday Reef (Mote)	Between Sugarloaf and Looe Key	24° 34'45.0" N	81° 29'48.9" W	2019-10-23	64	70	+	-	-	Complete mortality	14
McD-1	M. cavernosa	FL Keys	Big Pine Key	Within Looe Key Sanctuary	24° 32'31.2" N	81° 24'42.0" W	2019-01-30	20	90	+	-	+	Complete mortality	12
McD-2	M. cavernosa	FL Keys	Big Pine Key	Within Looe Key Sanctuary	24° 32'31.2" N	81° 24'42.0" W	2019-01-30	25	60	+	-	+	Complete mortality	19
McD-3	M. cavernosa	FL Keys	Big Pine Key	Within Looe Key Sanctuary	24° 32'31.2" N	81° 24'42.0" W	2019-01-30	25	50	+	-	-	Stopped	5
McD-4	M. cavernosa	FL Keys	Big Pine Key	Within Looe Key Sanctuary	24° 32'31.2" N	81° 24'42.0" W	2019-01-30	10	75	+	+	+	Complete mortality	8
McD-5	M. cavernosa	FL Keys	Big Pine Key	Within Looe Key Sanctuary	24° 32'31.2" N	81° 24'42.0" W	2019-01-30	10	75	-	+	-	Stopped	3
McD-6	M. cavernosa	FL Keys	Big Pine Key	Within Looe Key Sanctuary	24° 32'31.2" N	81° 24'42.0" W	2019-01-30	6	50	+	+	-	Stopped	9
McD-7	M. cavernosa	FL Keys	Big Pine Key	Within Looe Key Sanctuary	24° 32'31.2" N	81° 24'42.0" W	2019-01-30	18	40	+	-	+	Complete mortality	1.5
McD-8	M. cavernosa	FL Keys	Big Pine Key	Within Looe Key Sanctuary	24° 32'31.2" N	81° 24'42.0" W	2019-01-30	40	50	+	-	+	Complete mortality	3
McD-9	M. cavernosa	FL Keys	Boot Key-MOTE	Reefs surrounding Boot Key	24°41′46″ N	81°06′07″ W	2019-04-05	15	33	+	-	-	Complete mortality	2
McD-10	M. cavernosa	FL Keys	Boot Key-MOTE	Reefs surrounding Boot Key	24°41′46″ N	81°06′07″ W	2019-04-05	25	25	+	+	-	Complete mortality	4
McD-11	M. cavernosa	FL Keys	Boot Key-MOTE	Reefs surrounding Boot Key	24°41′46″ N	81°06′07″ W	2019-04-05	15	50	+	-	+	Complete mortality	2
McD-12	M. cavernosa	FL Keys	Boot Key-MOTE	Reefs surrounding Boot Key	24°41′46″ N	81°06′07″ W	2019-04-05	12	60	+	-	-	Complete mortality	7
McD-13	M. cavernosa	FL Keys	Boot Key-MOTE	Reefs surrounding Boot Key	24°41′46″ N	81°06′07″ W	2019-04-05	5	70	+	-	-	Slow prgression	21
McD-14	M. cavernosa	FL Keys	Boot Key-MOTE	Reefs surrounding Boot Key	24°41′46″ N	81°06′07″ W	2019-04-05	8	75	+	+	-	Complete mortality	5
McD-15	M. cavernosa	FL Keys	Boot Key-MOTE	Reefs surrounding Boot Key	24°41′46″ N	81°06′07″ W	2019-04-05	10	80	+	-	-	Stopped	3
McD-16	M. cavernosa	FL Keys	Boot Key-MOTE	Reefs surrounding Boot Key	24°41′46″ N	81°06′07″ W	2019-04-05	8	60	+	-	+	Complete mortality	9
McD-17	M. cavernosa	FL Keys	Boot Key-MOTE	Reefs surrounding Boot Key	24°41′46″ N	81°06′07″ W	2019-04-05	12	50	+	-	-	Complete mortality	7
McD-18	M. cavernosa	FL Keys	Boot Key-MOTE	Reefs surrounding Boot Key	24°41′46″ N	81°06′07″ W	2019-04-05	20	20	+	-	-	Complete mortality	8
McD-19	M. cavernosa	FL Keys	Boot Key-MOTE	Reefs surrounding Boot Key	24°41′46″ N	81°06′07″ W	2019-04-05	15	10	-	+	-	Slow prgression	21
McD-20	M. cavernosa	FL Keys	Boot Key-MOTE	Reefs surrounding Boot Key	24°41′46″ N	81°06′07″ W	2019-04-05	12	20	-	+	-	Stopped	6
McD-21	M. cavernosa	FL Keys	Sand Key	Sand Key	24°27'14.4" N	81°52'39.0" W	2019-05-03	12	30	+	-	+	Complete mortality	3
McD-22	M. cavernosa	FL Keys	Sand Key	Sand Key	24°27'14.4" N	81°52'39.0" W	2019-05-03	18	80	+	-	-	Stopped	3
McD-23	M. cavernosa	FL Keys	Sand Key	Sand Key	24°27'14.4" N	81°52'39.0" W	2019-05-03	15	50	+	-	-	Stopped	7
McD-24	M. cavernosa	FL Keys	Sand Key	Sand Key	24°27'14.4" N	81°52'39.0" W	2019-05-03	10	40	+	+	-	Stopped	1
McD-25	M. cavernosa	FL Keys	Karen's Patch 2	Just W of Looe Key	24°33'52.4" N	81°28'23.4" W	2019-09-09	40	70	-	+	-	Stopped	1
McD-26	M. cavernosa	FL Keys	Karen's Inside Patch	Just NW of Looe Key	24° 34'43.2" N	81° 26'19.2" W	2019-09-09	42	95	-	+	-	Stopped	1
McD-27	M. cavernosa	FL Keys	Karen's Inside Patch	Just NW of Looe Key	24° 34'43.2" N	81° 26'19.2" W	2019-09-09	28	90	-	+	-	Stopped	1
McD-28	M. cavernosa	FL Keys	Karen's Inside Patch	Just NW of Looe Key	24° 34'43.2" N	81° 26'19.2" W	2019-09-09	40	90	-	+	-	Stopped	1
McD-29	M. cavernosa	FL Keys	Sand Key	Sand Key	24°27'14.4" N	81°52'39.0" W	2019-10-11	15	40	+	+	-	Slow prgression	21
McD-30	M. cavernosa	FL Keys	Sand Key	Sand Key	24°27'14.4" N	81°52'39.0" W	2019-10-11	10	85	-	+	-	Stopped	1
McD-31	M. cavernosa	FL Keys	Sand Key	Sand Key	24°27'14.4" N	81°52'39.0" W	2019-10-11	25	95	-	+	-	Stopped	1
McD-32	M. cavernosa	FL Keys	Sand Key	Sand Key	24°27'14.4" N	81°52'39.0" W	2019-10-11	20	75	+	-	-	Slow prgression	21
McD-33	M. cavernosa	FL Keys	Sand Key	Sand Key	24°27'14.4" N	81°52'39.0" W	2019-10-11	20	60	+	-	+	Complete mortality	11
McD-34	M. cavernosa	FL Keys	Sand Key	Sand Key	24°27'14.4" N	81°52'39.0" W	2019-10-11	6	75	+	-	-	Slow prgression	21
McD-34B	M. cavernosa	FL Keys	Sand Key	Sand Key	24°27'14.4" N	81°52'39.0" W	2019-10-11	6	90	-	+	-	Stopped	1
McD-35	M. cavernosa	FL Keys	Sand Key	Sand Key	24°27'14.4" N	81°52'39.0" W	2019-10-11	16	50	+	+	-	Slow prgression	21
McD-36	M. cavernosa	FL Keys	Sand Key	Sand Key	24°27'14.4" N	81°52'39.0" W	2019-10-11	24	60	+	-	+	Complete mortality	21
McD-37	M. cavernosa	FL Keys	Sand Key	Sand Key	24°27'14.4" N	81°52'39.0" W	2019-10-11	10	70	+	-	-	Slow prgression	21
McD-38	M. cavernosa	FL Keys	Acer 17/18	Just W of Looe Key	24°32'51.6" N	81°27'25.1" W	2019-10-23	35	75	+	-	-	Stopped	11
McD-41	M. cavernosa	FL Keys	Acer 17/18	Just W of Looe Key	24°32'51.6" N	81°27'25.1" W	2019-10-23	25	65	+	+	-	Stopped	1
McD-43	M. cavernosa	FL Keys	Birthday Reef	Between Sugarloaf and Looe Key	24° 34'45.0" N	81° 29'48.9" W	2019-10-23	91	90	+	+	+	Complete mortality	10
McD-45	M. cavernosa	FL Keys	Birthday Reef	Between Sugarloaf and Looe Key	24° 34'45.0" N	81° 29'48.9" W	2019-10-23	120	50	+	-	+	Complete mortality	10
McD-46	M. cavernosa	FL Keys	Birthday Reef	Between Sugarloaf and Looe Key	24° 34'45.0" N	81° 29'48.9" W	2019-10-23	35	95	+	-	-	Stopped	1
OfD-1	O. faveolata	FL Keys	Karen's Patch 2	Just W of Looe Key	24°33'52.4" N	81°28'23.4" W	2019-09-09	16	70	+	+	-	Stopped	21
OfD-2	O. faveolata	FL Keys	Karen's Patch 2	Just W of Looe Key	24°33'52.4" N	81°28'23.4" W	2019-09-09	12	90	+	+	-	Stopped	21
OfD-3	O. faveolata	FL Keys	Karen's Patch 2	Just W of Looe Key	24°33'52.4" N	81°28'23.4" W	2019-09-09	16	70	-	+	-	Stopped	1
OfD-4	O. faveolata	FL Keys	Karen's Patch 2	Just W of Looe Key	24°33'52.4" N	81°28'23.4" W	2019-09-09	14	30	+	+	-	Complete mortality	20
OfD-5	O. faveolata	FL Keys	Karen's Inside Patch	Just NW of Looe Key	24° 34'43.2" N	81° 26'19.2" W	2019-09-09	40	70	+	-	-	Complete mortality	8
OfD-6	O. faveolata	FL Keys	Looe Ball 21- Karen	Just SE of Looe Key	24° 32'40.8" N	81° 24'31.0" W	2019-09-09	15	95	+	-	-	Complete mortality	7
OfD-7	O. faveolata	FL Keys	Looe Ball 21- Karen	Just SE of Looe Key	24° 32'40.8" N	81° 24'31.0" W	2019-09-09	15	60	+	+	-	Slow prgression	21
OfD-8	O. faveolata	FL Keys	Karen's Patch 2	Just W of Looe Key	24°33'52.4" N	81°28'23.4" W	2019-09-09	12	40	+	+	-	Complete mortality	19
OfD-9	O. faveolata	FL Keys	Sand Key	Sand Key	24°27'14.4" N	81°52'39.0" W	2019-10-11	5	60	+	+	-	Complete mortality	20
OfD-10	O. faveolata	FL Keys	Sand Key	Sand Key	24°27'14.4" N	81°52'39.0" W	2019-10-11	8	60	+	-	+	Complete mortality	11
OfD-11	O. faveolata	FL Keys	Sand Key	Sand Key	24°27'14.4" N	81°52'39.0" W	2019-10-11	20	95	-	+	-	Stopped	1
OfD-13	O. faveolata	FL Keys	Sand Key	Sand Key	24°27'14.4" N	81°52'39.0" W	2019-10-11	5	80	+	+	-	Stopped	1
OfD-14	O. faveolata	FL Keys	Sand Key	Sand Key	24°27'14.4" N	81°52'39.0" W	2019-10-11	15	60	+	+	-	Slow prgression	21
OfD-15	O. faveolata	FL Keys	Sand Key	Sand Key	24°27'14.4" N	81°52'39.0" W	2019-10-11	11	50	+	-	+	Complete mortality	12
OfD-16	O. faveolata	FL Keys	Sand Key	Sand Key	24°27'14.4" N	81°52'39.0" W	2019-10-11	7	60	+	-	-	Stopped	11
OfD-17	O. faveolata	FL Keys	Sand Key	Sand Key	24°27'14.4" N	81°52'39.0" W	2019-10-11	7	60	+	-	+	Complete mortality	7
OfD-18	O. faveolata	FL Keys	Sand Key	Sand Key	24°27'14.4" N	81°52'39.0" W	2019-10-11	10	75	+	-	-	Complete mortality	21
OfD-19	O. faveolata	FL Keys	Sand Key	Sand Key	24°27'14.4" N	81°52'39.0" W	2019-10-11	16	75	+	-	+	Complete mortality	13
OfD-20	O. faveolata	FL Keys	Acer 17/18	Just W of Looe Key	24°32'51.6" N	81°27'25.1" W	2019-10-23	36	90	+	-	-	Complete mortality	8
OfD-22	O. faveolata	FL Keys	Acer 17/18	Just W of Looe Key	24°32'51.6" N	81°27'25.1" W	2019-10-23	35	50	+	-	+	Complete mortality	5
PsD-1	P. strigosa	FL Keys	Karen's Inside Patch	Just NW of Looe Key	24° 34'43.2" N	81° 26'19.2" W	2019-09-09	56	10	+	-	-	Complete mortality	2
PsD-2	P. strigosa	FL Keys	Karen's Inside Patch	Just NW of Looe Key	24° 34'43.2" N	81° 26'19.2" W	2019-09-09	16	85	+	-	-	Complete mortality	3
PsD-3	P. strigosa	FL Keys	ACER 24- Karen	Looe Key	24° 33'10.2" N	81° 26'14.3" W	2019-09-09	36	65	+	-	-	Complete mortality	5
PsD-4	P. strigosa	FL Keys	ACER 24- Karen	Looe Key	24° 33'10.2" N	81° 26'14.3" W	2019-10-23	72	85	+	-	-	Stopped	1
